# Supplementary material for: A facile smartphone-based digital image colorimetric sensor for the determination of tetracyclines in water using natural phenolic compounds induced to grow gold nanoparticles
Source: Royal Society of Chemistry journal article supplement (doi:10.1039/d5ra00091b), 2025-01-01
Supplement: d5ra00091b1.pdf [file d5ra00091b1.pdf]

## **A Facile Smartphone-based Digital Image Colorimetric Sensor for the Determination of Tetracyclines in Water using Natural Phenolic Compounds Induced to Growth Gold Nanoparticles**

**Kraingkrai Ponghong <sup>a</sup>, Tammanoon Nilnit <sup>a</sup>, Chang Young Lee <sup>b</sup>, Worapan Kusakunniran <sup>c</sup>, Phoonthawee Saetear <sup>d,e</sup>, Sam-ang Supharoek <sup>\*f,g</sup>**

<sup>a</sup> Multidisciplinary Research Unit of Pure and Applied Chemistry, Department of Chemistry and Center of Excellence for Innovation in Chemistry, Faculty of Science, Mahasarakham University, Maha Sarakham 44150, Thailand

<sup>b</sup> School of Energy and Chemical Engineering, Ulsan National Institute of Science and Technology (UNIST), Ulsan 44919, Republic of Korea

<sup>c</sup> Faculty of Information and Communication Technology, Mahidol University, 999 Phuttamonthon 4 Road, Salaya, Nakhon Pathom 73170, Thailand

<sup>d</sup> Department of Chemistry, Faculty of Science, Mahidol University, 272 Rama VI Road, Ratchatawi, Bangkok 10400, Thailand

<sup>e</sup> Flow-Innovation Research for Science and Technology Laboratories (FIRST labs), Department of Chemistry and Center of Excellence for Innovation in Chemistry, Faculty of Science, Mahidol University, 272 Rama VI Road, Ratchatawi, Bangkok 10400, Thailand

<sup>f</sup> Department of Medical Science, Mahidol University, Amnatcharoen Campus, Amnat Charoen 37000, Thailand

<sup>g</sup> Department of Chemistry and Center of Excellence for Innovation in Chemistry, Faculty of Science, Mahidol University, Bangkok 10400, Thailand

Corresponding author: samang.sup@mahidol.ac.th

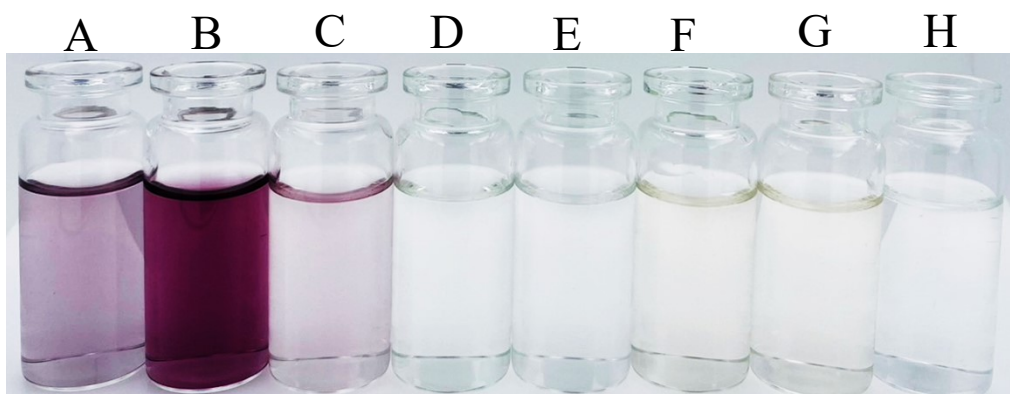

Fig. S1 Different conditions for TC determination, (A) Natural phenolic compound,  $\text{AuCl}_3$  under NaOH (Blank), (B) Natural phenolic compound,  $\text{AuCl}_3$ , TC under NaOH, (C)  $\text{AuCl}_3$  and TCs under NaOH, (D)  $\text{AuCl}_3$  under NaOH, (E)  $\text{AuCl}_3$  and TCs, (F) Natural phenolic compound and TC under NaOH, (G) TC under NaOH, (H) Natural phenolic compound under NaOH.

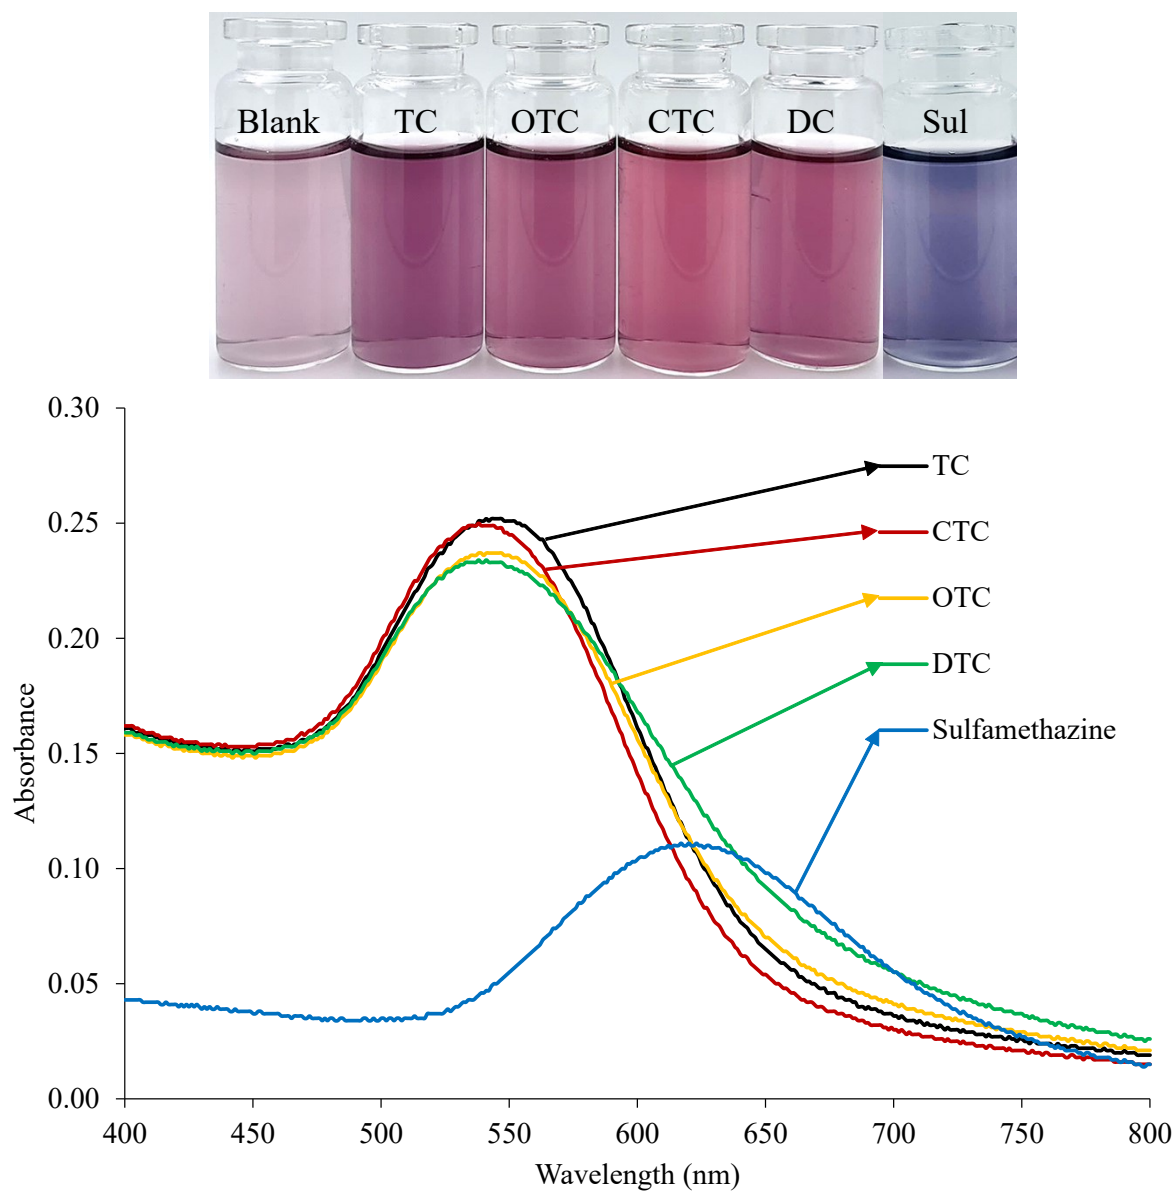

Fig. S2 Photo images of AuNPs induced with natural reagent in the presence of tetracycline (TC), oxytetracycline (OTC), chlortetracycline (CTC), doxycycline (DC), sulfamethazine (Sul), and the surface plasmon resonance (SPR) of AuNPs with different antibiotics.

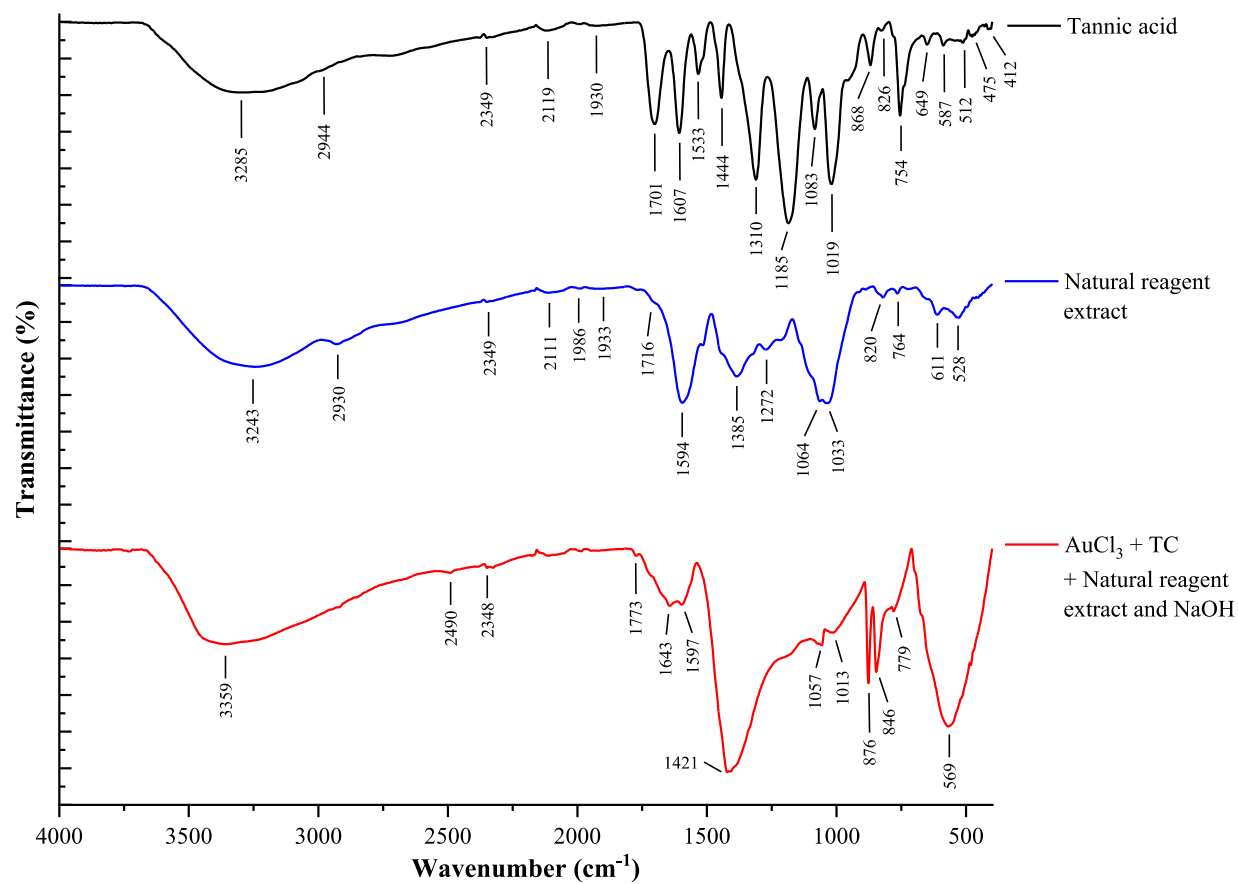

Fig. S3 FTIR spectra of natural reagent extract overlay with standard tannic acid, and AuCl<sub>3</sub>, natural reagent extract and TC.

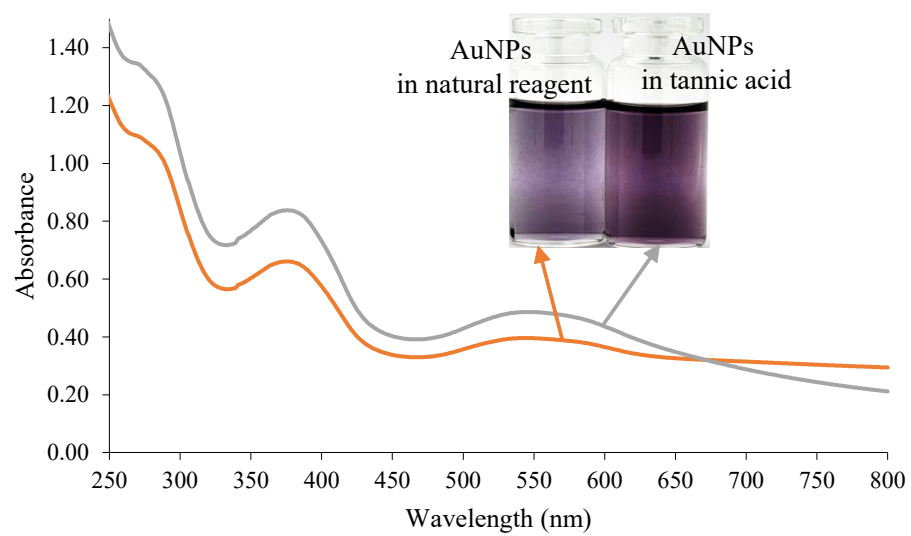

Fig. S4 Surface plasmon resonance of AuNPs in the presence of tetracycline with natural reagent or standard tannic acid.

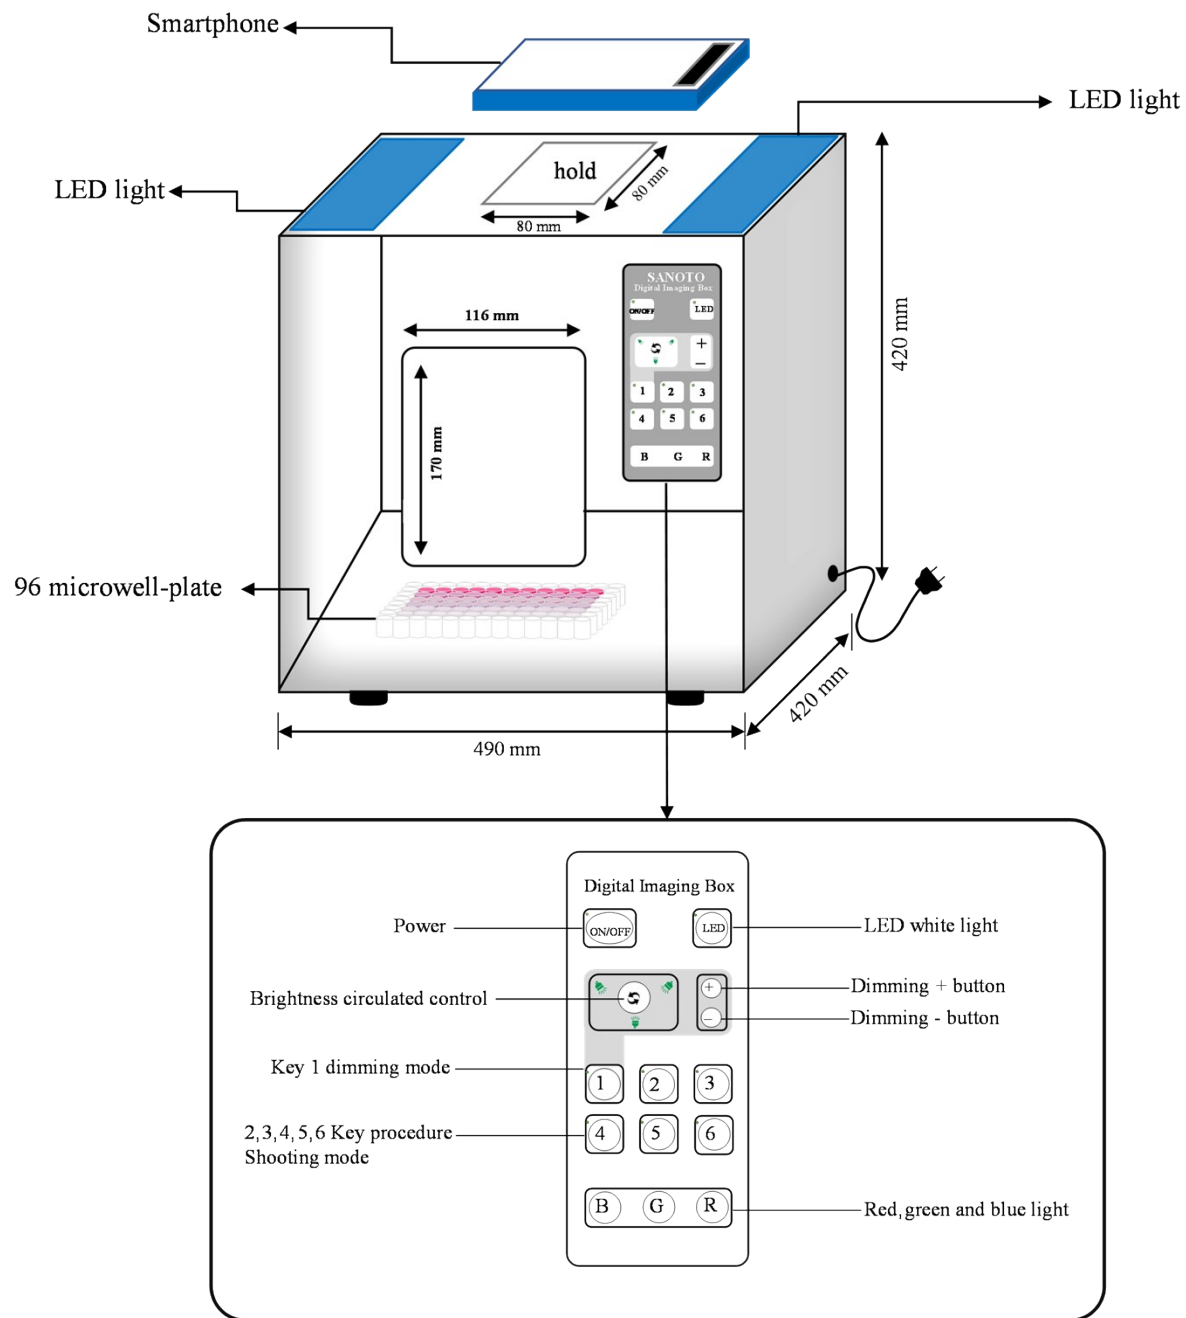

Fig. S5 Light control box cabinet.

Table S1 Optimal conditions for tetracycline determination using AuNPs capped with natural phenolic extracts

| Parameter                                                 | Optimal condition |
|-----------------------------------------------------------|-------------------|
| Red, Green, and Blue intensity                            | Green             |
| Detection volume in microplate ( $\mu\text{L}$ )          | 300               |
| Concentration of $\text{AuCl}_3$ ( $\text{mmol L}^{-1}$ ) | 1.0               |
| Volume of natural phenolic extracts ( $\mu\text{L}$ )     | 60                |
| Concentration of $\text{NaOH}$ ( $\text{mmol L}^{-1}$ )   | 1                 |
| Incubation temperature ( $^{\circ}\text{C}$ )             | 40                |
| Incubation time (min)                                     | 20                |

Table S2. Penalty points (PPs)

| Reagent                    | Penalty points (PPs) |           |                                           | Instrument          | PPs |
|----------------------------|----------------------|-----------|-------------------------------------------|---------------------|-----|
|                            | Amount PP            | Hazard PP | Total PPs<br>(Amount PP×<br>Hazard<br>PP) |                     |     |
| ACN (<10 mL)               | 1                    | 4         | 4                                         | Centrifuge          | 1   |
| AuCl <sub>3</sub> (<10 mL) | 1                    | 1         | 1                                         | Heater/stirrer      | 2   |
| NaOH (<10 mL)              | 1                    | 2         | 2                                         | Smartphone-based    | 0   |
|                            |                      |           |                                           | Occupational hazard | 0   |
|                            |                      |           |                                           | Vortex              | 1   |
|                            |                      |           |                                           | Ultrasonic bath     | 2   |
|                            |                      |           |                                           | Waste               | 5   |
| Subtotal PP                | -                    | -         | 7                                         |                     | 11  |
| Total PPs                  | -                    | -         | 18                                        |                     |     |
| Analytical Eco-Scale score |                      |           | 82                                        |                     |     |



## Analytical Greenness report sheet

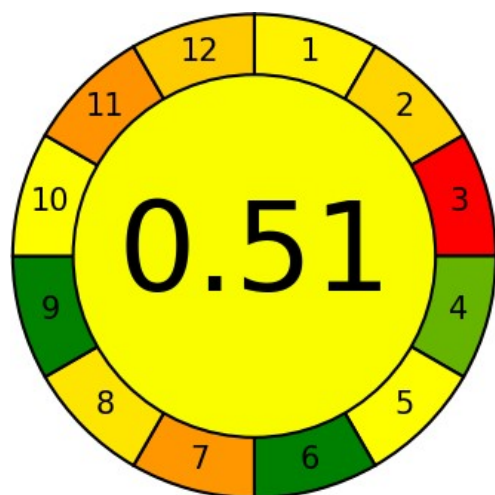

1. Sample treatment
2. Sample amount
3. Device positioning
4. Sample prep. stages
5. Automation, miniaturization
6. Derivatization
7. Waste
8. Analysis throughput
9. Energy consumption
10. Source of reagents
11. Toxicity
12. Operator's safety

| Criteria                                                                                                                             | Score | Weight |
|--------------------------------------------------------------------------------------------------------------------------------------|-------|--------|
| 1. Direct analytical techniques should be applied to avoid sample treatment.                                                         | 0.48  | 2      |
| 2. Minimal sample size and minimal number of samples are goals.                                                                      | 0.42  | 2      |
| 3. If possible, measurements should be performed in situ.                                                                            | 0.0   | 2      |
| 4. Integration of analytical processes and operations saves energy and reduces the use of reagents.                                  | 0.8   | 2      |
| 5. Automated and miniaturized methods should be selected.                                                                            | 0.5   | 2      |
| 6. Derivatization should be avoided.                                                                                                 | 1.0   | 2      |
| 7. Generation of a large volume of analytical waste should be avoided, and proper management of analytical waste should be provided. | 0.3   | 2      |
| 8. Multi-analyte or multi-parameter methods are preferred versus methods using one analyte at a time.                                | 0.45  | 2      |
| 9. The use of energy should be minimized.                                                                                            | 1.0   | 2      |
| 10. Reagents obtained from renewable sources should be preferred.                                                                    | 0.5   | 2      |
| 11. Toxic reagents should be eliminated or replaced.                                                                                 | 0.29  | 2      |
| 12. Operator's safety should be increased.                                                                                           | 0.4   | 2      |

Fig. S6 Result of AGREE assessment.
